# Supplementary material for: Construction of uniform MgO nanoshells for improved high-voltage performance of Li-ion batteries
Source: Royal Society of Chemistry journal article supplement (doi:10.1039/d4cc05626d), 2024-11-21
Supplement: d4cc05626d1.pdf [file d4cc05626d1.pdf]

# Supporting Information

## Construction of Uniform MgO Nanoshells for Improved High-Voltage Performance of Li-Ion Battery

### Experimental Section

#### Sample Preparation.

All chemicals used in this study were of analytical grade and procured from Sinopharm Chemical Reagent Co., Ltd. They were utilized as received without any further purification. Milli-Q water (resistivity > 18 MΩ) was employed for all experimental procedures.

#### Preparation of Silicon dioxide (SiO<sub>2</sub>) nanoparticles with Mg (OH)<sub>2</sub> coating.

The SiO<sub>2</sub> nanoparticles were prepared using the classical Stöber method.<sup>1</sup> Specifically, 1 mL tetraethyl orthosilicate (TEOS), 2 mL deionized water and 3 mL ammonia solution (28 wt%) were added into 150 mL ethanol and allowed to react for 24 h at room temperature.

The SiO<sub>2</sub>@Mg(OH)<sub>2</sub> sample was synthesized with a wet chemistry process, 90 mg magnesium acetate tetrahydrate (Mg(CH<sub>3</sub>COO)<sub>2</sub>·4H<sub>2</sub>O), 64 mg urea, and 32 mg hexamethylenetetramine (HMTA) were dissolved in 30 mL of deionized water. Subsequently, 15 mg SiO<sub>2</sub> was dispersed into this buffer solution via ultrasound treatment. The mixture was continuously stirred at 80 °C for 5 h. The final product was collected through washing and centrifugation cycles and dried at 80 °C for 12 h. The thickness of the Mg (OH)<sub>2</sub> shell could be adjusted by varying the amounts of SiO<sub>2</sub> used in the synthesis process.

#### Preparation of lithium-rich manganese-based cathode material coating with Mg (OH)<sub>2</sub> (R-Li-Mn@Mg (OH)<sub>2</sub>).

The lithium-rich manganese-based cathode material (R-Li-Mn) was purchased from Ningbo Gauss New Energy Technology Co. For preparing R-Li-Mn@Mg (OH)<sub>2</sub> nanoparticles, 90 mg Mg(CH<sub>3</sub>COO)<sub>2</sub> · 4H<sub>2</sub>O, 64 mg urea and 32 mg HMTA were dissolved in 30 mL deionized water, followed by the dispersion of 500 mg pristine R-Li-Mn powders in it. The mixture was stirred at 80°C. After 5 h, the products were collected by centrifugation and dried at 80 °C.

#### Synthesis of pristine LiNi<sub>0.5</sub>Mn<sub>1.5</sub>O<sub>4</sub> (LNMO-P) materials.

The pristine LNMO cathode material was synthesized with a sol-gel process. Specifically, lithium acetate, nickel acetate, and manganese acetate were dissolved in deionized water with a molar ratio of 1.03:0.5:1.5. Glycolic acid was added into this solution as a chelating agent. The pH of the solution was tuned to 8.5–9.0 using ammonium hydroxide. After the evaporation at 80 °C, the resulting gel was sintered at 900°C in atmosphere for 10 h.

#### Preparation of LiNi<sub>0.5</sub>Mn<sub>1.5</sub>O<sub>4</sub> materials coating with Mg (OH)<sub>2</sub> (LNMO@ Mg (OH)<sub>2</sub>) and MgO (LNMO-Mg).

90 mg Mg (CH<sub>3</sub>COO)<sub>2</sub> · 4H<sub>2</sub>O, 64 mg urea and 32 mg HMTA were dissolved in 30 mL deionized water, followed by the dispersion of 1 g pristine LNMO powders in it. The mixture was stirred at 80°C. After 5 h, the products were collected by centrifugation and dried at 80 °C to obtain the sample of LNMO@5nm Mg (OH)<sub>2</sub>. The LNMO-Mg sample was prepared by calcining the sample of LNMO@5nm Mg (OH)<sub>2</sub> at 650 °C for 2 h. The thickness of Mg(OH)<sub>2</sub> shell can be adjusted by changing the amount of LNMO powder in the synthesis process. The samples with different Mg(OH)<sub>2</sub> coating thicknesses (2 nm and 10 nm) were sintered at 650°C for 2h to obtain samples with different MgO coating thicknesses (LNMO@2 nm Mg(OH)<sub>2</sub>-650°C and LNMO@10 nm Mg(OH)<sub>2</sub>-650 °C).

#### Material Characterization.

Transmission electron microscopy (TEM), high-resolution TEM (HRTEM), and energy-dispersive spectroscopy (EDS) elemental mapping in dark-field mode were captured using a JEOL 2100F instrument at an operating voltage of 200 kV. X-ray diffraction (XRD) patterns were generated utilizing a Bruker D8 Advance diffractometer with Cu Kα radiation (λ = 1.5418 Å). X-ray photoelectron spectroscopy (XPS)

measurements were performed on a Kratos Axis Supra using Al K $\alpha$  radiation, with binding energies calibrated relative to the hydrocarbon C 1s peak at 284.8 eV.

#### Electrochemical Tests.

Electrochemical measurements were tested with CR2032 coin cells assembled in an argon-filled glovebox using lithium metal as the counter and reference electrodes. The cathodes were prepared by mixing the active materials, acetylene black (Super-p), and poly(vinyl difluoride) (PVDF, Aldrich) at a weight ratio of 8:1:1, pasting on a pure Al foil (99%, Goodfellow), and cutting into circular electrodes with diameter of 1.0 cm. Polypropylene membrane (Celgard) was used as a separator. The electrolyte, 1 M LiPF<sub>6</sub> in ethylene carbonate (EC)/dimethyl carbonate (DMC)/diethyl carbonate (DEC) (1:1:1, in vol %), was purchased from Kishida Chemical Co., Ltd. Galvanostatic tests of the assembled cells were performed with a Land CT2001A battery test system between 3.0 and 5.0 V. The electrochemical impedance spectroscopy (EIS) was tested on an electrochemical workstation (Auto Lab, PGSTA302N).

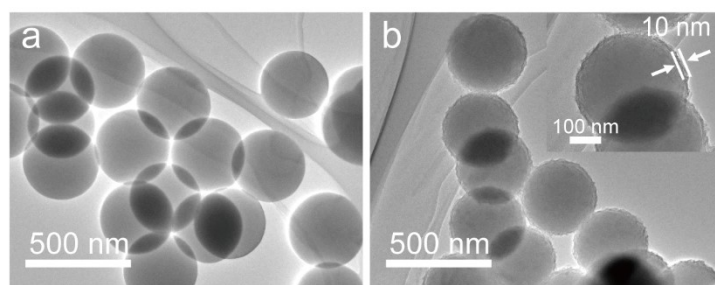

**Figure S1.** TEM image of SiO<sub>2</sub> nanospheres (a) and SiO<sub>2</sub> nanospheres coated with 10 nm magnesium species (b).

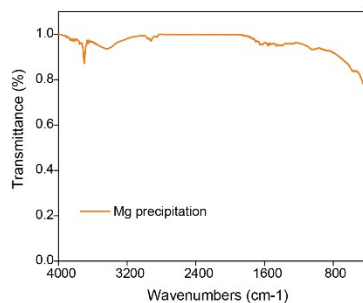

**Figure S2.** Fourier transform infrared spectroscopy (FTIR) spectra of Mg precipitation. The pronounced and intense peak observed at 3697 cm<sup>-1</sup> is attributed to the OH group present in magnesium precipitation, while the strong peak around 440 cm<sup>-1</sup> corresponds to the Mg–O stretching vibration. The bands within the range of 1440–1650 cm<sup>-1</sup> are associated with the –OH stretching mode in water. Additionally, a broad band at 3440 cm<sup>-1</sup> is ascribed to surface-adsorbed –OH groups.<sup>2</sup>

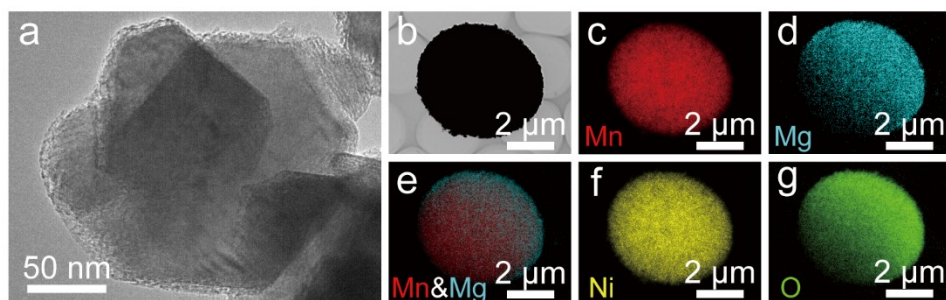

**Figure S3.** TEM images (a) and corresponding EDS spectra (b-g) of lithium-rich manganese-based cathode particles coated with  $\text{Mg}(\text{OH})_2$  nanolayer.

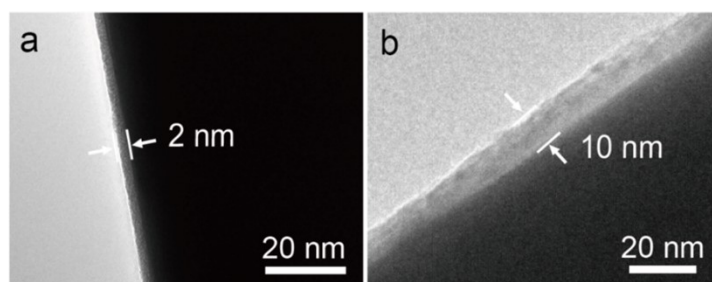

**Figure S4.** TEM images of LNMO coated with different thicknesses of  $\text{Mg}(\text{OH})_2$ : (a) 2 nm and (b) 10 nm.

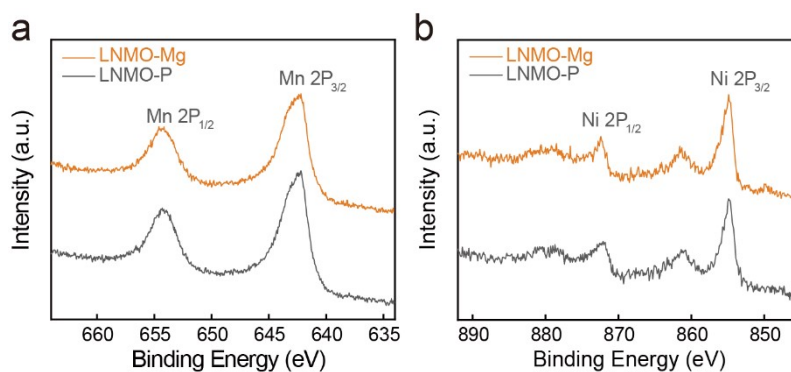

**Figure S5.** The Mn 2p (a) and Ni 2p (b) XPS peaks of LNMO-Mg and LNMO-P.

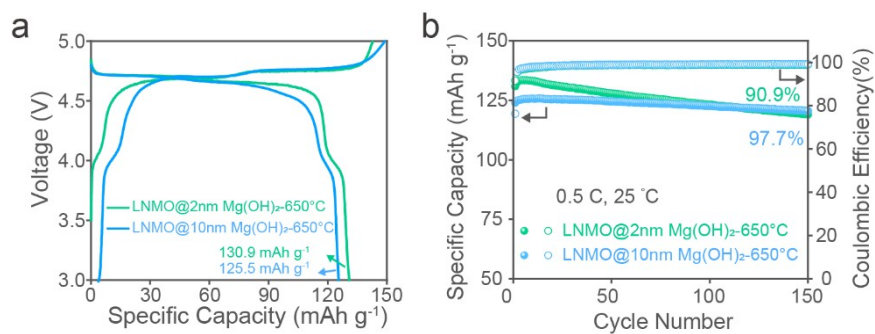

**Figure S6.** Charge and discharge profiles for the first cycle (a) and cycling performance (b) of LNMO@2 nm  $\text{Mg}(\text{OH})_2$ -650°C and LNMO@10 nm  $\text{Mg}(\text{OH})_2$ -650°C button half-cells at 0.5 C for 150 cycles.

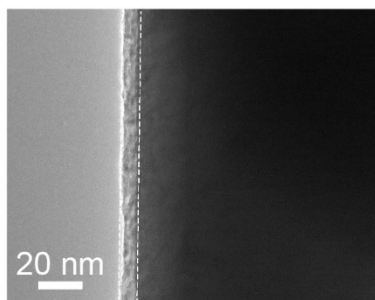

**Figure S7.** HRTEM of LNMO-Mg after 150 cycles at 0.5 C.

**Table S1.** The EIS fitting results for LNMO-P and LNMO-Mg samples before and after cycling.

| <b>Sample</b>            | <b>Re(<math>\Omega</math>)</b> | <b>Rct(<math>\Omega</math>)</b> |
|--------------------------|--------------------------------|---------------------------------|
| LNMO-P (before cycling)  | 2.0                            | 123.2                           |
| LNMO-Mg (before cycling) | 2.0                            | 58.1                            |
| LNMO-P (after cycling)   | 3.9                            | 276.9                           |
| LNMO-Mg (after cycling)  | 3.4                            | 146.1                           |

## References

1. W. Stöber, A. Fink, E. J. J. o. c. Bohn and i. science, 1968, **26**, 62-69.
2. D. An, X. Ding, Z. Wang and Y. Liu, *Colloids and Surfaces A: Physicochemical and Engineering Aspects*, 2010, **356**, 28-31.
